# Supplementary material for: Diet control to achieve euglycaemia induces tau hyperphosphorylation via AMPK activation in the hippocampus of diabetic rats
Source: Royal Society of Chemistry journal article supplement (doi:10.1039/c9fo00709a), 2019-11-13
Supplement: c9fo00709a1.pdf [file c9fo00709a1.pdf]

## Supplementary information

**S1 Fig. The pathophysiological feature of hippocampus by H & E staining including dentate gyrus (DG) and CA3 region as well as CA1 region.**

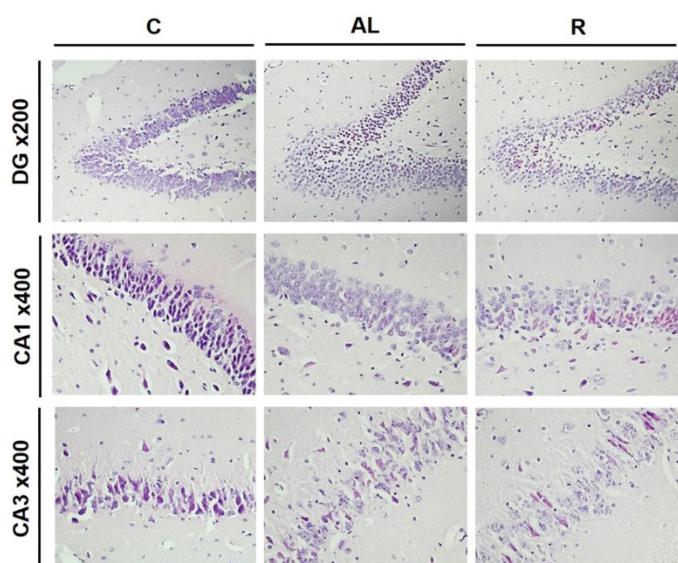

**Table S1. Antibodies used**

| Antibody                 | Host   | Species Cross-Reactivity                                                          | Catalog No | Source     |
|--------------------------|--------|-----------------------------------------------------------------------------------|------------|------------|
| AMPK                     | Rabbit | Human, Mouse, Rat, Monkey, Hamster                                                | 2532       | CST        |
| Phospho-AMPK             | Rabbit | Human, Mouse, Rat, D. melanogaster, S. cerevisiae; phospho-Thr <sup>172</sup>     | 4188       | CST        |
| Akt                      | Rabbit | Human, Mouse, Rat, Monkey, D. melanogaster                                        | 4691       | CST        |
| Phospho-Akt              | Rabbit | Human, Mouse, Rat, Monkey, Hamster, Bovine, D. melanogaster, Zebrafish            | 4060       | CST        |
| GSK-3 $\beta$            | Rabbit | Human, Mouse, Rat, Hamster                                                        | 5558       | CST        |
| Phospho-GSK-3 $\beta$    | Rabbit | Human, Mouse, Rat, Monkey; pSer <sup>9</sup>                                      | 12456      | CST        |
| PP2A                     | Rabbit | Human, Mouse, Rat, Bovine, Chicken                                                | 07-1216    | Millipore  |
| Phospho-PP2A             | Rabbit | Human, Mouse, Rat, Bovine, Chicken                                                | 05-547     | Millipore  |
| Tau                      | Rabbit | Human, Mouse                                                                      | PA5-27287  | Invitrogen |
| Phospho-tau              | Rabbit | Human, Mouse, Rat; pSer <sup>199/202</sup>                                        | 44-768G    | Invitrogen |
| Phospho-tau              | Rabbit | Human, Rat; pSer <sup>396</sup>                                                   | 710298     | Invitrogen |
| Beta-actin               | Rabbit | Human, Mouse, Rat, Monkey, Mink, Hamster, Bovine, D. melanogaster, Zebrafish, Dog | 4967       | CST        |
| 2 <sup>nd</sup> Antibody | Goat   | Rabbit, HRP-conjugated                                                            | 7074       | CST        |

CST, Cell Signaling Technology
